# Supplementary material for: Mean-field model of melting in superheated crystals based on a single experimentally measurable order parameter
Source: PubMed Central journal article supplement (PMC8429456; doi:10.1038/s41598-021-97124-7), 2021-09-09
Supplement: 41598_2021_97124_MOESM1_ESM.pdf [file 41598_2021_97124_MOESM1_ESM.pdf]

# Mean-field model of melting in superheated crystals based on a single experimentally measurable order parameter (Supplementary Materials)

Nikita P. Kryuchkov,<sup>1</sup> Nikita A. Dmitryuk,<sup>1</sup> Wei Li,<sup>2</sup> Pavel V. Ovcharov,<sup>1</sup>  
Yilong Han,<sup>2</sup> Andrei V. Sapelkin,<sup>3</sup> and Stanislav O. Yurchenko<sup>1</sup>

<sup>1</sup>*Bauman Moscow State Technical University, 2nd Baumanskaya street 5, 105005 Moscow, Russia*

<sup>2</sup>*Department of Physics, Hong Kong University of Science and Technology, Clear Water Bay, Hong Kong SAR, China*

<sup>3</sup>*School of Physics and Astronomy, Queen Mary University of London, London E1 4NS, England*

(Dated: July 21, 2021)

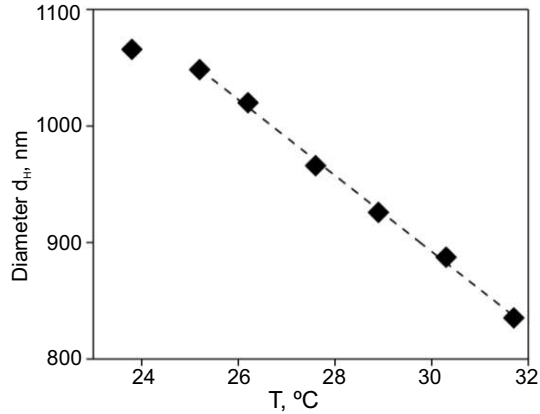

Figure S1. **Temperature dependence of the diameter  $d_H(T)$  of NIPAm particles used in the present work:** The laser heating elicits the decrease in the particle diameter and volume fraction.

Supplemental Movie 1 – experimental observation of nucleation and formation of melting front in colloidal crystal.

Supplemental Movie 2 – MD simulation of nucleation and formation of melting front in superheated crystal.

Supplemental Movie 3 – evolution of 2D (cylindrical) subcritical  $\lambda^2$ -fluctuation (nuclei).

Supplemental Movie 4 – evolution of 2D (cylindrical) supercritical  $\lambda^2$ -fluctuation (nuclei).

Supplemental Movie 5 – spontaneous nucleation due to thermal noise (formation of 2D nuclei).

Supplemental Movie 6 – spontaneous nucleation due to thermal noise (formation of 3D nuclei).

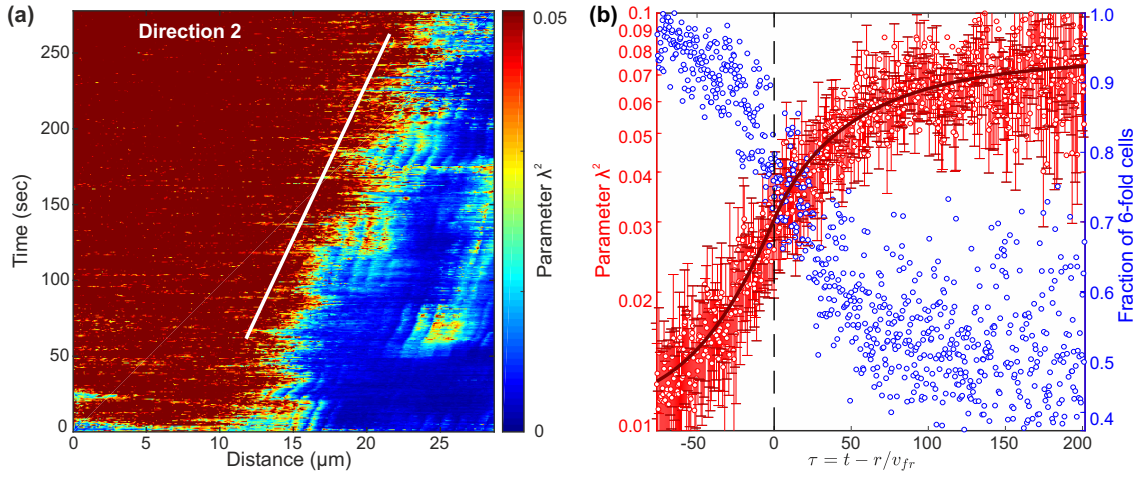

Figure S2. **Experimental self-similar profile of melting front:** (a) Evolution of  $\lambda^2$  in the radial direction of interest (2) shown in Fig. 2(a) in the main text. (b) Self-similar profile  $\lambda^2(\tau)$ , the red symbols are experimental points, the red solid line is a fit given by Eq. (9) in the main text. The blue symbols are the fraction of 6-fold cells in the plane of analysis.

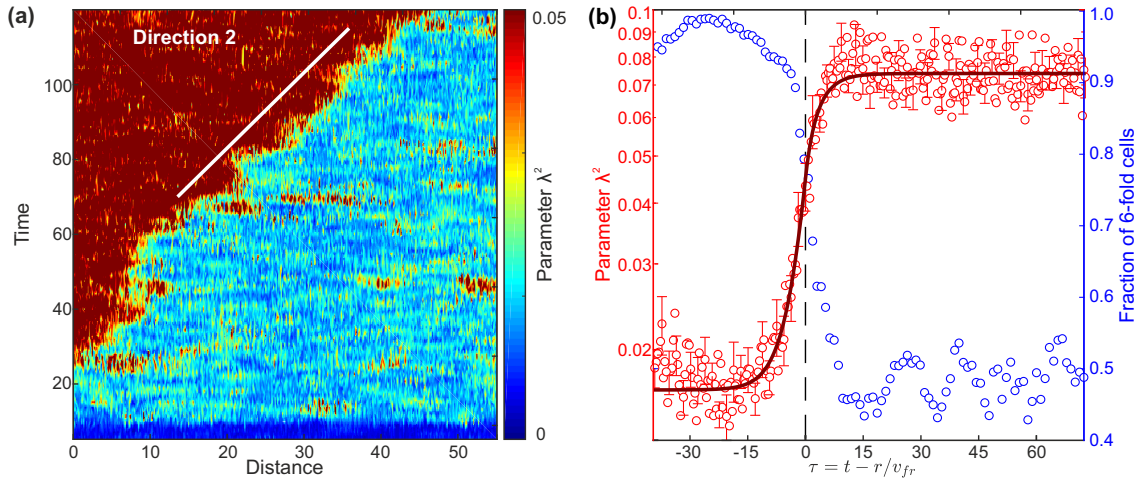

Figure S3. **MD self-similar profile of melting front:** (a) Evolution of  $\lambda^2$  in the radial direction of interest (2) shown in Fig. 3(a) in the main text. (b) Self-similar profile  $\lambda^2(\tau)$ , the red symbols are MD points, the red solid line is a fit given by Eq. (9) in the main text. The blue symbols are the fraction of 6-fold cells in the plane of analysis.

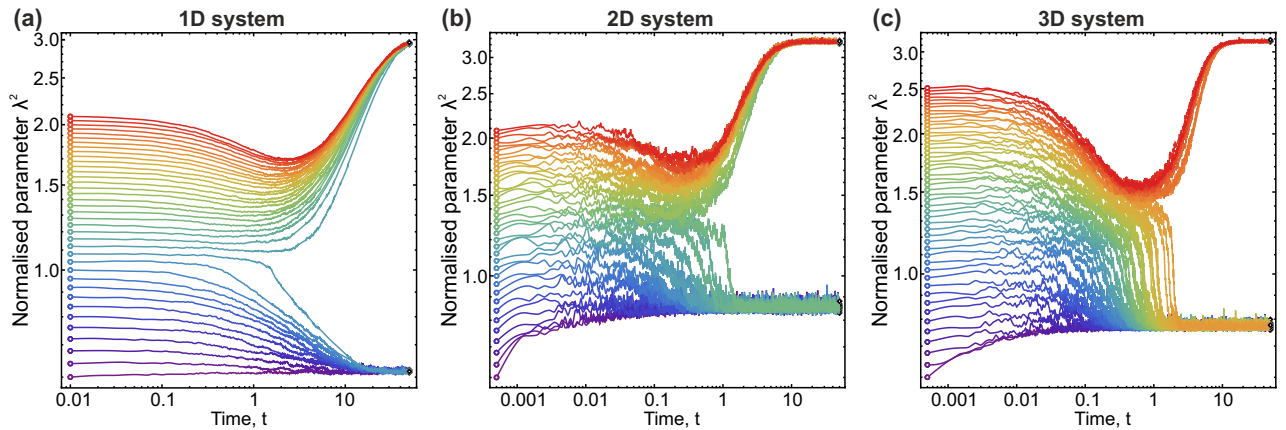

Figure S4. **The typical effect of thermal noise on the evolution of  $\lambda^2$ -field:**  $\epsilon = 10^{-4}$  in 1D, 2D, and 3D cases shown in panels (a)-(c), respectively. Other description is the same as in Fig. 4 in the main text.
